# Supplementary material for: In-vitro inhaled bioavailability of particle-bound per- and polyfluoroalkyl substances: Affecting factors and risk assessment
Source: Research Square preprint supplement (doi:10.21203/rs.3.rs-6925163/v1), 2025-07-01
Supplement: Supplementary file 1 [file 08ffd9279070e07491671165.docx]

***In-vitro* inhaled** **bioavailability of particle-bound per- and poly****fluoroalkyl substances: Affecting factors and risk assessment**

Bin Wang1, Yiming Yao2, *, Hongwen Sun2, *

1College of Resources and Environmental Engineering, Key Laboratory of Karst Georesources and Environment, Ministry of Education, Guizhou University, Guiyang 550025, China

2MOE Key Laboratory of Pollution Processes and Environmental Criteria, College of Environmental Science and Engineering, Nankai University, Tianjin 300350, China

*Corresponding author: Yiming Yao; Hongwen Sun

Nankai University

38 Tongyan Road, Jinnan District, Tianjin 300350, China

Phone: 86-22-2350924

E-mail: [yimingyao@nankai.edu.cn](mailto:yimingyao@nankai.edu.cn) (Y. Yao); [sunhongwen@nankai.edu.cn](mailto:sunhongwen@nankai.edu.cn) (H. Sun)

**Table of Contents**

[Table S1. Information of target per- and polyfluoroalkyl substances (PFAS) and corresponding mass-labelled standards. 3](#_Toc200941021)

[Table S2. Compositions of two kinds of artificial simulated lung fluid (ALF: artificial lysosomal fluid; MGS: modified Gamble’s solution) (ng/mL). 6](#_Toc200941022)

[Table S3. Information limits of quantification (LOQs, ng/L), matrix-spiked recoveries (MSR, %), procedural blanks (ng/mL) and method detection limits (MDLs, ng/mL) of target compounds. 7](#_Toc200941023)

[Table S4. Parameters used in risk assessments (Yu et al., 2018). 8](#_Toc200941024)

[Table S5. Mean concentrations (ng/g) of PFAS in atmospheric particulate matter at the sampling site. 9](#_Toc200941025)

[Table S6. Mean concentrations (ng/mL) of PFAS in simulated lung fluids. 10](#_Toc200941026)

[Reference 14](#_Toc200941027)

# Table S1. Information of target per- and polyfluoroalkyl substances (PFAS) and corresponding mass-labelled standards.

| Target compounds | Abbreviation | Molecular Formula | Internal Standards |
| --- | --- | --- | --- |
| Trifluoroacetic acid | TFA | CF3COOH | 13C-TFA/ 13C4-PFBA |
| Perfluoropropionic acid | PFPrA | C2F5COOH | 13C4-PFBA |
| Perfluorobutanoic acid | PFBA | C3F7COOH | 13C4-PFBA |
| Perfluoropentanoic acid | PFPeA | C4F9COOH | 13C4-PFPeA |
| Perfluorohexanoic acid | PFHxA | C5F11COOH | 13C2-PFHxA |
| Perfluoroheptanoic acid | PFHpA | C6F13COOH | 13C4-PFHpA |
| Perfluorooctanoic acid | PFOA | C7F15COOH | 13C4-PFOA |
| Perfluorononanoic acid | PFNA | C8F17COOH | 13C5-PFNA |
| Perfluorodecanoic acid | PFDA | C9F19COOH | 13C2-PFDA |
| Perfluroundecanoic acid | PFUnDA | C10F21COOH | 13C2-PFUnDA |
| Perfluorododecanoic acid | PFDoDA | C11F23COOH | 13C2-PFDoDA |
| Perfluorobutane sulfonic acid | PFBS | C4F9SO3H | 18O2-PFHxS |
| Perfluorohexane sulfonic acid | PFHxS | C6F13SO3H | 18O2-PFHxS |
| Perfluorooctane sulfonic acid | PFOS | C8F17SO3H | 13C4-PFOS |
| Perfluorodecane sulfonic acid | PFDS | C10F21SO3H | 13C4-PFOS |
| 6:2 Fluorotelomer unsaturated carboxylic acid | 6:2 FTUCA | C5F11CF=CHCOOH | 13C2-8:2 FTUCA |
| 6:2 Fluorotelomer carboxylic acid | 6:2 FTCA | C6F13CH2COOH | 13C4-PFOA |
| 8:2 Fluorotelomer unsaturated carboxylic acid | 8:2 FTUCA | C7F15CF=CHCOOH | 13C2-8:2 FTUCA |
| 8:2 Fluorotelomer carboxylic acid | 8:2 FTCA | C8F17CH2COOH | 13C4-PFOA |
| 4:2 Fluorotelomer sulfonic acid | 4:2 FTSA | C4F9CH2CH2SO3H | 13C2-6:2 FTSA |
| 6:2 Fluorotelomer sulfonic acid | 6:2 FTSA | C6F13CH2CH2SO3H | 13C2-6:2 FTSA |
| 8:2 Fluorotelomer sulfonic acid | 8:2 FTSA | C8F17CH2CH2SO3H | 13C2-8:2 FTSA |
| Perfluoroethylcyclohexanesulfonate | PFECHS | C2F5 (cyl-C6F10) SO3H | 13C4-PFOS |
| Sodium *p*-per uorous nonenoxybenzene sulfonate | OBS | (C3F7)2C=C(CF3)OC6H4SO3Na | 13C4-PFOS |
| Perfluoro-2-propoxypropanoic acid | HFPO-DA | C3F7OCF(CF3)COOH | 13C4-PFOA |
| Dodecafluoro-3H-4,8-dioxnonanoic acid | ADONA | CF3OC3F6OCHFCF2COOH | 13C4-PFOA |
| 6:2 Chlorinated polyfluorinated ether sulfonic acid | 6:2 Cl-PFESA | Cl-(CF2)6O(CF2)2SO3H | 13C4-PFOS |
| 8:2 Chlorinated polyfluorinated ether sulfonic acid | 8:2 Cl-PFESA | Cl-(CF2)8O(CF2)2SO3H | 13C4-PFOS |
| 6:2 Polyfluoroalkyl phosphoric acid diester | 6:2 diPAP | (C6F13CH2CH2O)2P(=O)OH | 13C4-6:2 diPAP |
| Perfluorooctane sulfonamide | FOSA | C8F17SO2NH2 | 13C4-PFOS |

# Table S2. Compositions of two kinds of artificial simulated lung fluid (ALF: artificial lysosomal fluid; MGS: modified Gamble’s solution) (ng/mL).

|  | **ALF (pH=4.5)** | **MGS (pH=7.4)** |
| --- | --- | --- |
| MgCl2•6H2O | 107 | 203 |
| NaCl | 3210 | 6020 |
| KCl | - | 298 |
| Na2HPO4•12H2O | 179 | 318 |
| Na2SO4 | 39 | 63 |
| CaCl2•2H2O | 128 | 368 |
| Citric acid | - | 952 |
| NaHCO3 | - | 2604 |
| Citric acid | 77 | 97 |
| NaOH | 6000 | - |
| Citric acid | 22700 | - |
| Glycine | 59 | - |
| Sodium tartrate dihydrate | 90 | - |
| Sodium lactate | 85 | - |
| Sodium pyruvate | 86 | - |
| DPPC | - | 100 |

# Table S3. Information limits of quantification (LOQs, ng/L), matrix-spiked recoveries (MSR, %), procedural blanks (ng/mL) and method detection limits (MDLs, ng/mL) of target compounds.

|  | **LOQ** | **ALF** |  |  |  | **MGS** |  |  |
| --- | --- | --- | --- | --- | --- | --- | --- | --- |
|  | **MSR** | **Blank** | **MDL** |  | **MSR** | **Blank** | **MDL** |
| PFBA | 46 | 99.4 | n.d. | 0.046 |  | 82.1 | n.d. | 0.046 |
| PFPeA | 89 | 87.3 | n.d. | 0.089 |  | 87.5 | n.d. | 0.089 |
| PFHxA | 47 | 96.9 | 0.1 | 0.12 |  | 79.6 | n.d. | 0.047 |
| PFHpA | 52 | 102 | n.d. | 0.052 |  | 99.2 | n.d. | 0.052 |
| PFOA | 38 | 99.1 | 0.21 | 0.21 |  | 87.4 | 0.3 | 0.33 |
| PFNA | 58 | 92.5 | n.d. | 0.058 |  | 82.5 | n.d. | 0.058 |
| PFDA | 31 | 93.2 | n.d. | 0.031 |  | 74.7 | n.d. | 0.031 |
| PFUnDA | 49 | 83.7 | n.d. | 0.049 |  | 79.2 | n.d. | 0.049 |
| PFDoDA | 80 | 86.3 | n.d. | 0.08 |  | 83.6 | n.d. | 0.08 |
| PFBS | 23 | 104 | n.d. | 0.023 |  | 86.9 | n.d. | 0.023 |
| PFHxS | 19 | 106 | n.d. | 0.019 |  | 83.7 | n.d. | 0.019 |
| PFOS | 44 | 111 | n.d. | 0.044 |  | 81.8 | n.d. | 0.044 |
| PFDS | 48 | 94.2 | n.d. | 0.048 |  | 96.6 | n.d. | 0.048 |
| 4:2 FTSA | 37 | 98.9 | n.d. | 0.037 |  | 85.8 | n.d. | 0.037 |
| 6:2 FTSA | 43 | 97.2 | n.d. | 0.043 |  | 77.9 | n.d. | 0.043 |
| 8:2 FTSA | 38 | 108 | n.d. | 0.038 |  | 81.9 | n.d. | 0.038 |
| 6:2 FTUCA | 44 | 92 | n.d. | 0.044 |  | 96.2 | n.d. | 0.044 |
| 6:2 FTCA | 80 | 93.8 | n.d. | 0.08 |  | 87.1 | n.d. | 0.08 |
| 8:2 FTUCA | 50 | 82.5 | n.d. | 0.05 |  | 80.8 | n.d. | 0.05 |
| 8:2 FTCA | 78 | 97.4 | n.d. | 0.078 |  | 84.7 | n.d. | 0.078 |
| PFECHS | 39 | 104 | n.d. | 0.039 |  | 90.7 | n.d. | 0.039 |
| 6:2 Cl-PFESA | 33 | 89.2 | n.d. | 0.033 |  | 80.9 | n.d. | 0.033 |
| 8:2 Cl-PFESA | 40 | 91.6 | n.d. | 0.04 |  | 102 | n.d. | 0.04 |
| ADONA | 21 | 102 | n.d. | 0.021 |  | 91.7 | n.d. | 0.021 |
| 6:2 FTAB | 46 | 114 | n.d. | 0.046 |  | 73.3 | n.d. | 0.046 |
| OBS | 79 | 106 | n.d. | 0.079 |  | 73.6 | n.d. | 0.079 |
| FOSA | 157 | 90.7 | n.d. | 1.57 |  | 86.5 | n.d. | 1.57 |
| 6:2 diPAP | 42 | 108 | n.d. | 0.042 |  | 89.7 | n.d. | 0.042 |

# Table S4. Parameters used in risk assessments ([Yu et al., 2018](#_ENREF_1)).

| **Age / y (Generation）** | **Gender** | **Body Weight / kg** | **Daily outdoor Inhalation Rate / L3 d-1）** |
| --- | --- | --- | --- |
| 0.5-4（toddlers） | Male | 15.7 | 3587 |
|  | Female | 15.3 | 2696 |
| 5-11（children） | Male | 32.2 | 4931 |
|  | Female | 32 | 3701 |
| 12-19（teens） | Male | 67.5 | 4375 |
|  | Female | 60.6 | 2018 |
| 20-59（adults） | Male | 86.8 | 4272 |
|  | Female | 74.7 | 1698 |
| ≥60（seniors） | Male | 84.1 | 2766 |
|  | Female | 72 | 904 |

# Table S5. Mean concentrations (ng/g) of PFAS in atmospheric particulate matter at the sampling site.

| **Compound** | **PM 1.0** | **PM 2.5** | **PM 10** |
| --- | --- | --- | --- |
| TFA | 271 | 121 | 343 |
| PFPrA | 264 | 195 | 447 |
| PFBA | 31 | 40 | 78 |
| PFPeA | 22 | 39 | 26 |
| PFHxA | 30 | 26 | 16 |
| PFHpA | 33 | 30 | 19 |
| PFOA | 885 | 800 | 214 |
| PFNA | n.d. | 6.7 | 7.9 |
| PFDA | 3.7 | 3.3 | 3.9 |
| PFUnDA | 2.8 | 3.8 | 2.2 |
| PFDoDA | 2.1 | 3.1 | 1.6 |
| PFBS | 1.8 | 12 | 4.6 |
| PFHxS | 19 | 0.18 | n.d. |
| PFOS | 74 | 144 | 103 |
| 6:2 FTSA | 15 | 32 | n.d. |
| 8:2 FTUCA | 3.6 | 2 | n.d. |
| OBS | 1347 | 1941 | 171 |
| 6:2 Cl-PFESA | 5.8 | 24 | 3.5 |
| 8:2 Cl-PFESA | 2.1 | 7.7 | 0.53 |
| 6:2 diPAP | 14 | 21 | 19 |

# Table S6. Mean concentrations (ng/mL) of PFAS in simulated lung fluids.

|  | **ALF** |  |  |  | **MGS** |  |  |
| --- | --- | --- | --- | --- | --- | --- | --- |
|  | **PM 1.0** | **PM 2.5** | **PM 10** |  | **PM 1.0** | **PM 2.5** | **PM 10** |
| **1 d** |  |  |  |  |  |  |  |
| PFBA | 2.3 | 2.8 | 2.5 |  | 2.2 | 3.3 | 2.4 |
| PFPeA | 1.5 | 1.8 | 1.7 |  | 1.4 | 2 | 1.7 |
| PFHxA | 2 | 2.2 | 2.1 |  | 1.9 | 2.4 | 2.3 |
| PFHpA | 1.7 | 2 | 1.8 |  | 1.5 | 2.2 | 1.8 |
| PFOA | 1.8 | 2.1 | 1.8 |  | 1.7 | 2.6 | 2 |
| PFNA | 2 | 2.2 | 2 |  | 1.9 | 2.3 | 2.3 |
| PFDA | 1.6 | 2.1 | 2 |  | 1.8 | 2.1 | 2.1 |
| PFUnDA | 1.7 | 1.8 | 1.8 |  | 1.2 | 1.7 | 1.6 |
| PFDoDA | 1.5 | 1.7 | 0.75 |  | 1 | 1.4 | 1.2 |
| PFBS | 2.1 | 2.3 | 2.8 |  | 1.6 | 2 | 2 |
| PFHxS | 2.1 | 2.4 | 2 |  | 2 | 2.3 | 2.2 |
| PFOS | 0.21 | 0.24 | 0.33 |  | 0.16 | 0.24 | 0.24 |
| PFDS | 0.42 | 0.23 | n.d. |  | 0.52 | 0.37 | 0.28 |
| 4:2 FTSA | 2 | 2.6 | 3 |  | 2.3 | 3.1 | 2.5 |
| 6:2 FTSA | 2.3 | 2.8 | 2.7 |  | 2.6 | 2.9 | 3.1 |
| 8:2 FTSA | 2.1 | 3.2 | 3.4 |  | 1.8 | 2.9 | 2.4 |
| 6:2 FTUCA | 1.3 | 1.2 | 1.4 |  | 1.3 | 1.6 | 1.5 |
| 6:2 FTCA | 1.7 | 1.3 | 1.7 |  | 2 | 1.7 | 1 |
| 8:2 FTUCA | 0.84 | 0.9 | 1.1 |  | 1.8 | 2.2 | 2 |
| 8:2 FTCA | 1.2 | 1.3 | 1.2 |  | 2.9 | 3.2 | 2.6 |
| PFECHS | 2.3 | 2.8 | 3.5 |  | 1.8 | 2.5 | 2.6 |
| 6:2 Cl-PFESA | 1.2 | 0.94 | 0.5 |  | 1.2 | 1.6 | 1.5 |
| 8:2 Cl-PFESA | 0.14 | n.d. | n.d. |  | 0.44 | 0.19 | 0.23 |
| ADONA | 1.5 | 1.9 | 1.7 |  | 1.6 | 2.1 | 1.8 |
| 6:2 FTAB | 1.4 | 2.5 | 6.5 |  | 1.2 | 1.5 | 1.5 |
| OBS | 1.8 | 0.72 | 5.2 |  | 1.4 | 2.4 | 3.1 |
| FOSA | 2.3 | n.d. | 1.1 |  | 2.1 | 2.5 | 2.2 |
| 6:2 diPAP | 1 | 0.86 | 3.1 |  | 1.2 | 1.9 | n.d. |
| **3 d** |  |  |  |  |  |  |  |
| PFBA | 2.1 | 2.3 | 1.9 |  | 2.1 | 2.3 | 2.4 |
| PFPeA | 1 | 0.93 | 0.94 |  | 0.9 | 0.8 | 1.2 |
| PFHxA | 1.9 | 1.9 | 2 |  | 2 | 2 | 2.1 |
| PFHpA | 2.1 | 2 | 1.6 |  | 1.8 | 2.3 | 2.1 |
| PFOA | 1.9 | 1.6 | 1.9 |  | 2.2 | 1.8 | 2 |
| PFNA | 1.9 | 2 | 2.1 |  | 2.1 | 2 | 1.8 |
| PFDA | 1.6 | 1.6 | 1.7 |  | 2.1 | 1.6 | 2 |
| PFUnDA | 1.9 | 1.8 | 1.9 |  | 1.3 | 1.2 | 1.5 |
| PFDoDA | 1.9 | 2.2 | 1.8 |  | 1 | 1.3 | 1.2 |
| PFBS | 2.5 | 2.3 | 3.1 |  | 2.3 | 2.7 | 2.5 |
| PFHxS | 2 | 1.9 | 2 |  | 2.4 | 2 | 2.1 |
| PFOS | 2.4 | 1.8 | 2.9 |  | 2.3 | 1.7 | 2.5 |
| PFDS | 0.45 | 0.15 | 0.14 |  | 0.42 | 0.42 | 0.42 |
| 4:2 FTSA | 3.9 | 2.8 | 4.5 |  | 2.8 | 2.7 | 2.9 |
| 6:2 FTSA | 2.6 | 2.9 | 3.4 |  | 2.9 | 1.9 | 3 |
| 8:2 FTSA | 1.9 | 2.2 | 1.7 |  | 1.8 | 2.5 | 2.2 |
| 6:2 FTUCA | 1.2 | 1.2 | 1.5 |  | 1.8 | 1.5 | 1.9 |
| 6:2 FTCA | 1.6 | 0.93 | 1 |  | 2 | 1.5 | 1.1 |
| 8:2 FTUCA | 0.7 | 0.81 | 0.81 |  | 2.2 | 1.9 | 2.1 |
| 8:2 FTCA | 0.57 | 0.26 | 0.9 |  | 2.4 | 1.4 | n.d. |
| PFECHS | 1.8 | 1.9 | 2.5 |  | 2.2 | 1.9 | 2.6 |
| 6:2 Cl-PFESA | 1.2 | 0.75 | 0.82 |  | 1.4 | 1.1 | 1.5 |
| 8:2 Cl-PFESA | 0.18 | n.d. | n.d. |  | 0.46 | 0.25 | 0.27 |
| ADONA | 1.8 | 1.7 | 2 |  | 2.1 | 1.8 | 2 |
| 6:2 FTAB | 2.3 | 3 | 4.1 |  | 2.4 | 2.1 | 2.4 |
| OBS | 2.8 | 4.8 | 2.9 |  | 3.2 | 1.4 | 1.6 |
| FOSA | 1.5 | n.d. | 0.89 |  | 2 | 1.8 | 0.67 |
| 6:2 diPAP | 0.7 | 1 | 0.48 |  | 1.8 | n.d. | 1.4 |
| **7 d** |  |  |  |  |  |  |  |
| PFBA | 2.6 | 2.3 | 2.4 |  | 3.4 | 2 | 2.5 |
| PFPeA | 0.9 | 1.2 | 1.2 |  | 1.1 | 1.5 | 1.4 |
| PFHxA | 1.9 | 2.3 | 2.4 |  | 2.6 | 2.5 | 2.5 |
| PFHpA | 2.1 | 2.2 | 2.7 |  | 2.6 | 2.5 | 2.3 |
| PFOA | 1.9 | 2.4 | 2.2 |  | 2.2 | 2.7 | 2.4 |
| PFNA | 2 | 2.6 | 2.7 |  | 1.6 | 2.2 | 1.8 |
| PFDA | 9.1 | 9.5 | n.d. |  | 4.2 | 2.1 | 5.7 |
| PFUnDA | 1.8 | 2.7 | 2 |  | 1.6 | 1.5 | 2.2 |
| PFDoDA | 1.5 | 3.3 | 1.8 |  | 1.2 | 1.4 | 1.7 |
| PFBS | 2.5 | 2.8 | 2.7 |  | 2.3 | 2.4 | 3.6 |
| PFHxS | 1.7 | 2.9 | 1.9 |  | 1.9 | 3.5 | 2.2 |
| PFOS | 2.4 | 3.7 | 2.3 |  | 2.6 | 2.3 | 1.9 |
| PFDS | 0.53 | 0.2 | 0.24 |  | 0.75 | 0.27 | 0.41 |
| 4:2 FTSA | 5.2 | 2.6 | n.d. |  | 1.1 | 5.8 | 1.6 |
| 6:2 FTSA | 2.2 | 3.1 | 1.6 |  | 3.2 | 3.2 | 3.2 |
| 8:2 FTSA | 1.8 | 2 | 2.3 |  | 2.1 | 2 | 2.8 |
| 6:2 FTUCA | 1.2 | 1.7 | 1.2 |  | 2 | 2.4 | 2.3 |
| 6:2 FTCA | 1.6 | 3.7 | 0 |  | 0.86 | 1.9 | 1.2 |
| 8:2 FTUCA | 0.25 | 0.26 | 0.16 |  | 2.2 | 2.1 | 2.2 |
| 8:2 FTCA | n.d. | n.d. | n.d. |  | 3 | 2.5 | 3.3 |
| PFECHS | 2.2 | 3.6 | 3.2 |  | 2.4 | 3.1 | 3.2 |
| 6:2 Cl-PFESA | 1.4 | 1.6 | 1.5 |  | 2 | 1.4 | 1.8 |
| 8:2 Cl-PFESA | 0.3 | 0.12 | 0 |  | 0.54 | 0.08 | 0.18 |
| ADONA | 1.6 | 2.4 | 1.9 |  | 2.1 | 2.2 | 2 |
| 6:2 FTAB | 54 | 59 | 72 |  | 31.3 | 42.6 | 53.8 |
| OBS | 3.9 | 5.7 | 4.4 |  | 1.6 | 4.8 | 1.7 |
| FOSA | n.d. | n.d. | 1.2 |  | 0.59 | 0.52 | 2.1 |
| 6:2 diPAP | 1 | 0.6 | 0.18 |  | 0.75 | 2.2 | 1.7 |
| **14 d** |  |  |  |  |  |  |  |
| PFBA | 2.7 | 2 | 2.2 |  | 2.6 | 2.5 | 2.7 |
| PFPeA | 1.1 | 1.3 | 1.1 |  | 1.1 | 1.8 | 1.3 |
| PFHxA | 2 | 2.2 | 2.3 |  | 2.2 | 2.9 | 2.6 |
| PFHpA | 2.7 | 2.8 | 3.3 |  | 2.2 | 2.6 | 2.6 |
| PFOA | 2.1 | 2.3 | 2.7 |  | 2.2 | 3.2 | 3.3 |
| PFNA | 2.2 | 2.5 | 2.6 |  | 2.2 | 2.8 | 2.5 |
| PFDA | 0.73 | 4.4 | 0.78 |  | 2.4 | 7.2 | 4 |
| PFUnDA | 1.3 | 2.3 | 2.9 |  | 1.8 | 2.1 | 2.3 |
| PFDoDA | 1.4 | 2.8 | 2.7 |  | 1.3 | 1.3 | 1.4 |
| PFBS | 2.5 | 3.7 | 3.4 |  | 2.5 | 3 | 3 |
| PFHxS | 2.7 | 1.6 | 2.7 |  | 2.6 | 3.3 | 2.5 |
| PFOS | 2.1 | 2.5 | 3.8 |  | 2.1 | 2.5 | 2.4 |
| PFDS | 0.55 | 0.17 | 0.43 |  | 0.63 | 1 | 0.45 |
| 4:2 FTSA | 5.6 | 4.6 | 6.8 |  | 1.3 | 2.6 | 2.4 |
| 6:2 FTSA | 2.6 | 2.2 | 4.1 |  | 3 | 3.4 | 3.9 |
| 8:2 FTSA | 2 | 2 | 2.6 |  | 2.3 | 2.6 | 2.5 |
| 6:2 FTUCA | 1 | 1.3 | 1.6 |  | 2.5 | 2.5 | 3 |
| 6:2 FTCA | n.d. | n.d. | n.d. |  | n.d. | 1.8 | 1.1 |
| 8:2 FTUCA | 0.26 | 0.18 | 0.26 |  | 2.8 | 4.2 | 3.4 |
| 8:2 FTCA | n.d. | n.d. | n.d. |  | 1.9 | 2.1 | 3.3 |
| PFECHS | 2.9 | 3.2 | 3.8 |  | 2.6 | 3.2 | 2.1 |
| 6:2 Cl-PFESA | 1.3 | 0.8 | 1.1 |  | 1.6 | 1.5 | 1.3 |
| 8:2 Cl-PFESA | 0.22 | 0.06 | n.d. |  | 0.31 | 0.52 | 0.18 |
| ADONA | 2.8 | 2.2 | 2.8 |  | 2.4 | 2.6 | 2.9 |
| 6:2 FTAB | 66 | 100 | 141 |  | 57.4 | 56.1 | 49.1 |
| OBS | 1.5 | 4 | 3.3 |  | 3.4 | 2.2 | 0.6 |
| FOSA | n.d. | n.d. | n.d. |  | n.d. | n.d. | n.d. |
| 6:2 diPAP | 0.36 | 2.1 | 1.3 |  | 1.8 | 0.26 | 3 |

# Reference

Yu, N., et al., 2018. Non-target and suspect screening of per- and polyfluoroalkyl substances in airborne particulate matter in China. Environmental Science & Technology. 52**,** 8205-8214.
